# Supplementary material
Source: MDPI journal article supplement (https://www.mdpi.com/2227-9040/11/2/114)
Supplement: s1 [file s1]

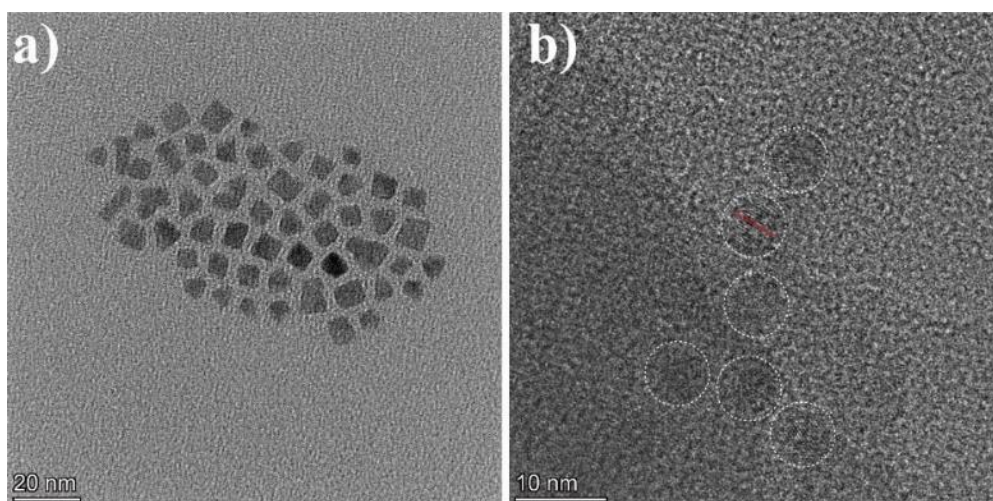

**Figure S1.** TEM images of oil-soluble red emitting CdSe/ZnS QDs.

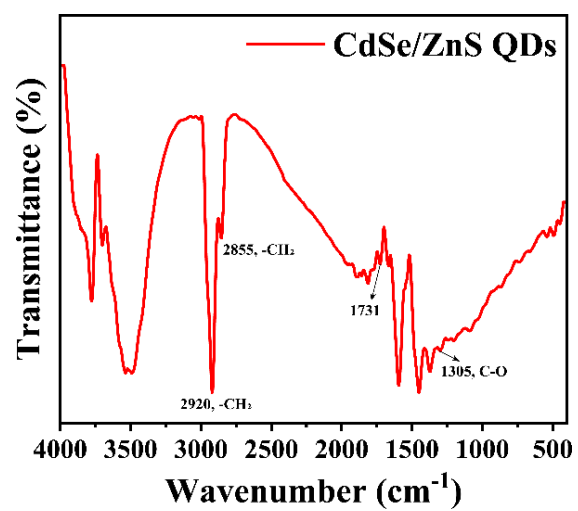

**Figure S2.** FT-IR spectra of oil-soluble red emitting CdSe/ZnS QDs.

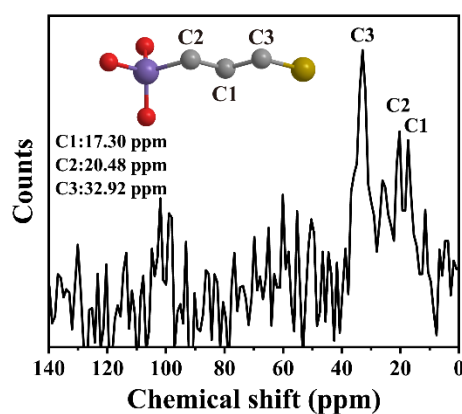

**Figure S3.** Solid-state  $^{13}\text{C}$  CP/MAS NMR spectrum of SH-MF NFs. (The inset is the schematic diagrams of 3-MPTMS).

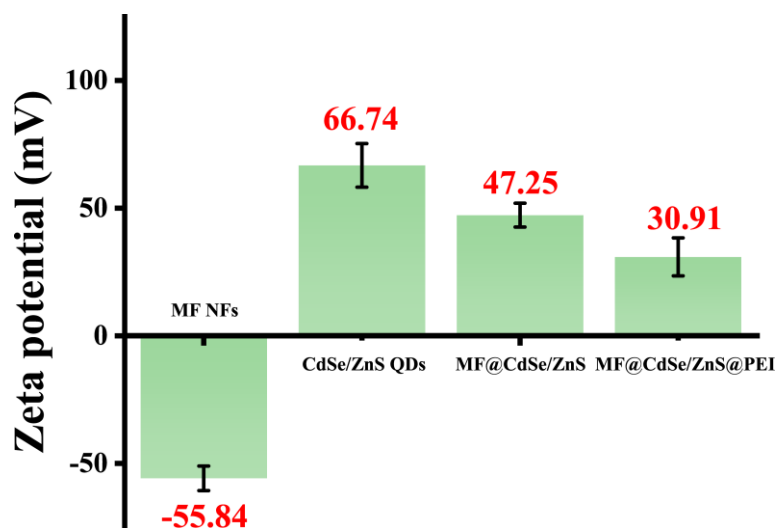

**Figure S4.**  $\zeta$ -potential results of MF NFs, hydrophobic CdSe/ZnS QDs, MF@CdSe/ZnS, and MF@CdSe/ZnS@PEI NFs.

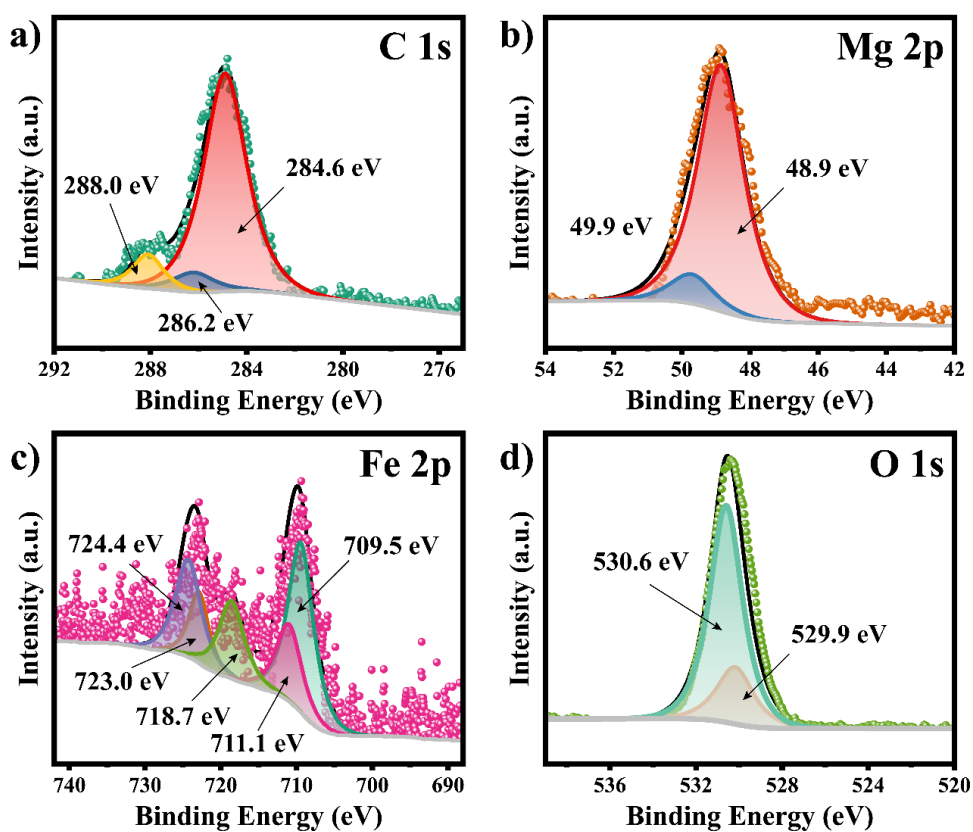

**Figure S5.** XPS spectra of (a) C 1s, (b) Mg 2p, (c) Fe 2p, and (d) O 1s of MF NFs.

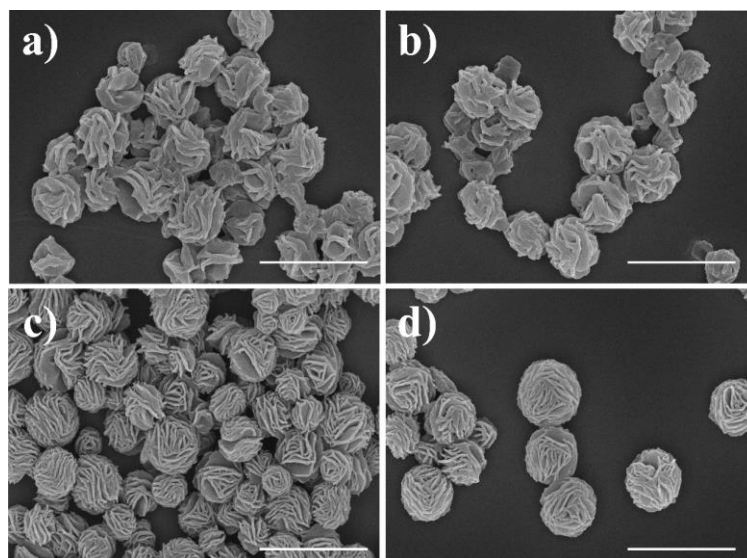

**Figure S6.** MF@CdSe/ZnS NFs coated with different concentrations of branched PEI (concentrations of a-d are 5, 1, 0.5, 0.1 mg/mL in order, the scale bar in the figures is 500 nm).

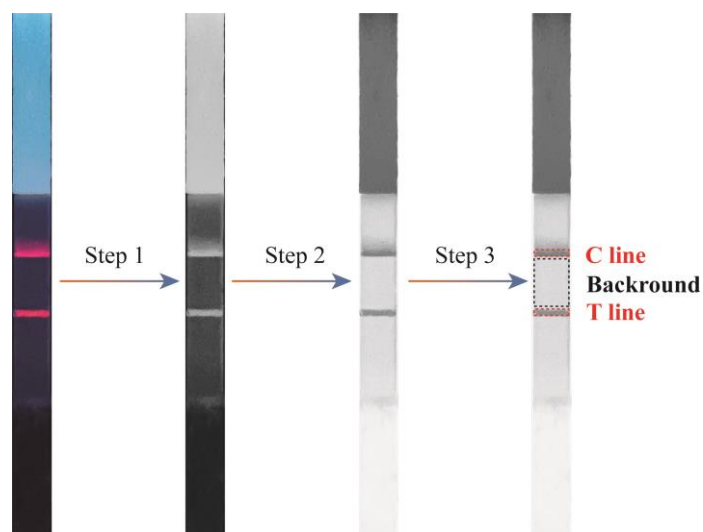

**Figure S7.** Image processing procedures of MF@CdSe/ZnS@PEI-ICTS. Step 1: convert the photo taken by the mobile phone into an 8-bit grayscale image. Step 2: obtain the inverse image of the grayscale image by using the "Invert" option. Step 3: define the average intensity of the T-line, C-line, and background regions in the inverse image.

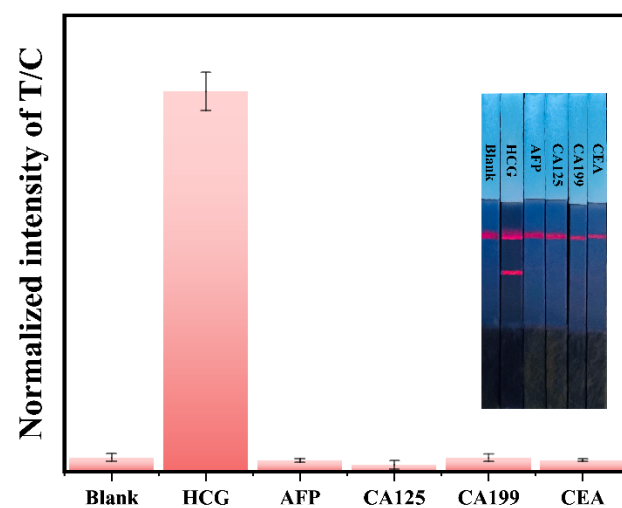

**Figure S8.** Cross-reactivity of MF@CdSe/ZnS@PEI-ICTS for different biomarkers.

**Table S1.** Recovery efficiency and coefficient of variation (CV) for the MF@CdSe/ZnS@PEI-ICTS for HCG (mIU/mL) to be detected in human serum samples (n = 3).

| Biomarker | Added | Found        | Recovery rate (%) | CV (%) |
|-----------|-------|--------------|-------------------|--------|
| HCG       | 100   | 90.48 ± 0.27 | 90.48             | 7.24   |
|           | 50    | 46.79 ± 0.83 | 93.58             | 3.66   |
|           | 10    | 11.61 ± 0.14 | 116.1             | 12.91  |

**Table S2.** Summary of HCG detection with some different detection methods.

| Methods                              | Limit of Detections (mIU/mL) |
|--------------------------------------|------------------------------|
| Electrochemiluminescence immunoassay | $3 \times 10^{-4}$ [1]       |
| Photothermal immunoassay             | $5.8 \times 10^{-3}$ [2]     |
| Lateral flow immunoassay             | 3 [3]                        |
| Lateral flow immunoassay             | 0.22 [4]                     |
| Lateral flow immunoassay             | 1 [5]                        |
| Electrochemical Immunosensors        | $1.67 \times 10^{-4}$ [6]    |
| MF@CdSe/ZnS@PEI-ICTS (this work)     | 0.1                          |

## References

1. Zhang, A.; Guo, W.; Ke, H.; Zhang, X.; Zhang, H.; Huang, C.; Yang, D.; Jia, N.; Cui, D. Sandwich-format ECL immunosensor based on Au star@BSA-Luminol nanocomposites for determination of human chorionic gonadotropin. *Biosensors and Bioelectronics* **2018**, *101*, 219-226, doi:<https://doi.org/10.1016/j.bios.2017.10.040>.
2. Hong, G.; Zhang, D.; He, Y.; Yang, Y.; Chen, P.; Yang, H.; Zhou, Z.; Liu, Y.; Wang, Y. New photothermal immunoassay of human chorionic gonadotropin using Prussian blue nanoparticle-based photothermal conversion. *Analytical and Bioanalytical Chemistry* **2019**, *411*, 6837-6845, doi:10.1007/s00216-019-02049-w.
3. Zhang, T.; Wang, H.-B.; Zhong, Z.-T.; Li, C.-Q.; Chen, W.; Liu, B.; Zhao, Y.-D. A smartphone-based rapid quantitative detection platform for lateral flow strip of human chorionic gonadotropin with optimized image algorithm. *Microchem. J.* **2020**, *157*, 105038, doi:<https://doi.org/10.1016/j.microc.2020.105038>.
4. Wang, X.; Xue, C.-H.; Yang, D.; Jia, S.-T.; Ding, Y.-R.; Lei, L.; Gao, K.-Y.; Jia, T.-T. Modification of a nitrocellulose membrane with nanofibers for sensitivity enhancement in lateral flow test strips. *RSC Advances* **2021**, *11*, 26493-26501, doi:10.1039/D1RA04369B.
5. Danthanarayana, A.N.; Finley, E.; Vu, B.; Kourentzi, K.; Willson, R.C.; Brgoch, J. A multicolor multiplex lateral flow assay for high-sensitivity analyte detection using persistent luminescent nanophosphors. *Analytical Methods* **2020**, *12*, 272-280, doi:10.1039/C9AY02247C.
6. Liang, H.; Ning, G.; Wang, L.; Li, C.; Zheng, J.; Zeng, J.; Zhao, H.; Li, C.-P. Covalent Framework Particles Modified with MnO<sub>2</sub> Nanosheets and Au Nanoparticles as Electrochemical Immunosensors for Human Chorionic Gonadotropin. *ACS Applied Nano Materials* **2021**, *4*, 4593-4601, doi:10.1021/acsanm.1c00199.
